# Supplementary material
Source: PubMed Central journal article supplement (PMC3193448)
Supplement: cr2011125x3.pdf [file cr2011125x3.pdf]

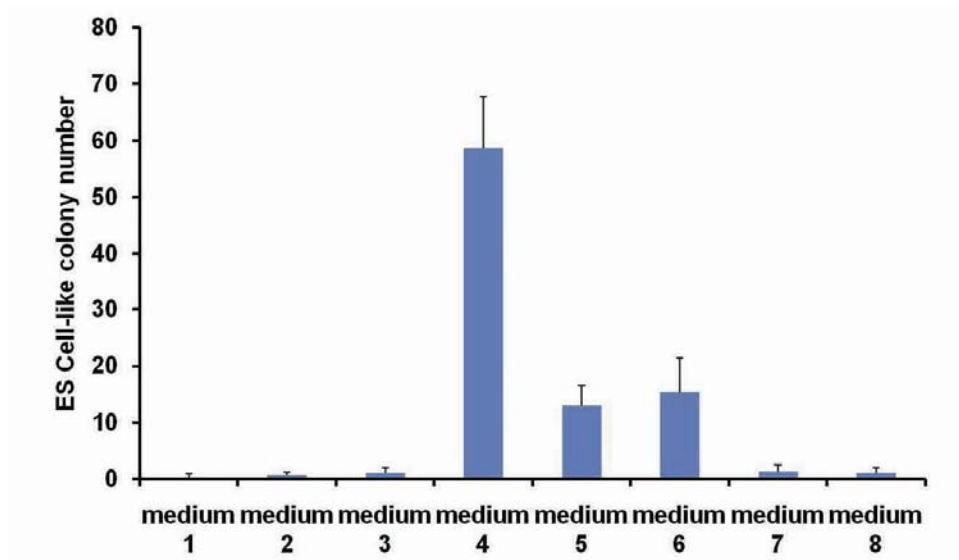

**Supplementary information, Figure S1** Numbers of ES-like colonies obtained from b6TF transduced BEFs cultured in different media ( $1 \times 10^4$  cells per 100 mm dish). Error bars represent S.D. (n= 3).
