# Supplementary material
Source: PubMed Central journal article supplement (PMC3193448)
Supplement: cr2011125x4.pdf [file cr2011125x4.pdf]

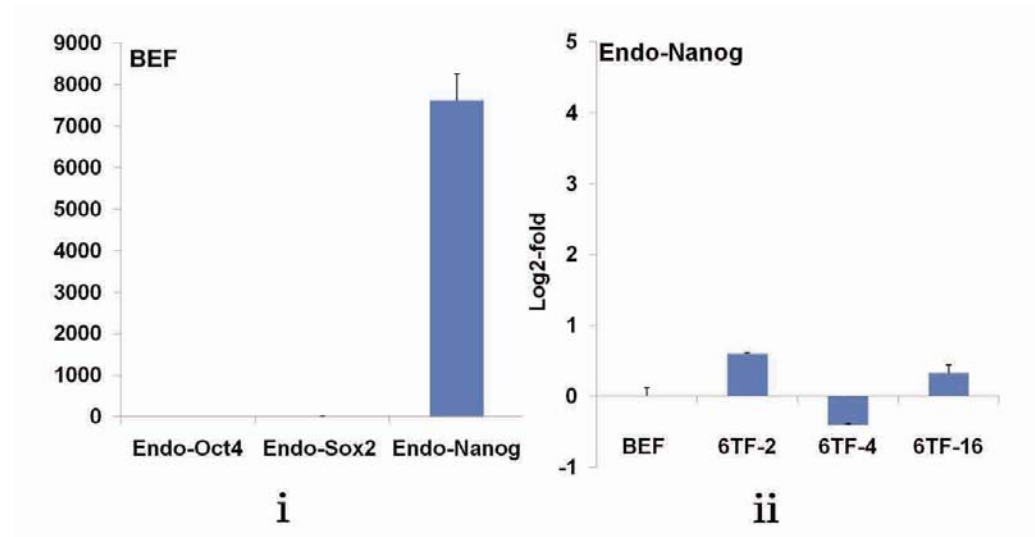

**Supplementary information, Figure S2** (i) Endogenous expression levels of *OCT4*, *SOX2* and *NANOG* in BEFs.

The y-axis indicates mRNA copy number per  $10^6$  copies of *GAPDH*. (ii) Endogenous expression levels of *NANOG* in biPS cells compared to BEFs. Error bars represent S.D. (n= 3).
