# Supplementary material
Source: PubMed Central journal article supplement (PMC3193448)
Supplement: cr2011125x5.pdf [file cr2011125x5.pdf]

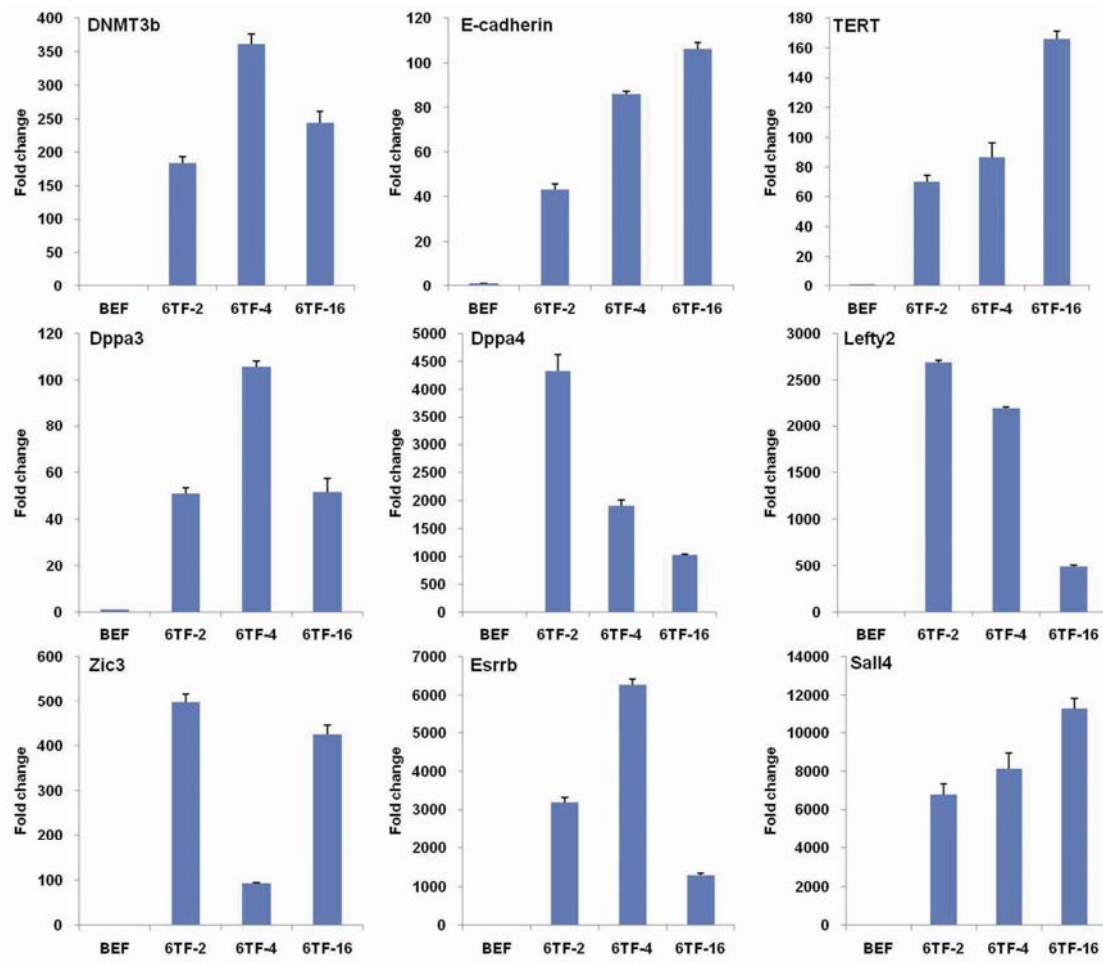

**Supplementary information, Figure S3** Other pluripotent gene expression levels of biPS cells.

The y axis represents fold change relative to BEFs' expression. Error bars represent S.D. (n=

3)
