# Supplementary material
Source: PubMed Central journal article supplement (PMC3193448)
Supplement: cr2011125x6.pdf [file cr2011125x6.pdf]

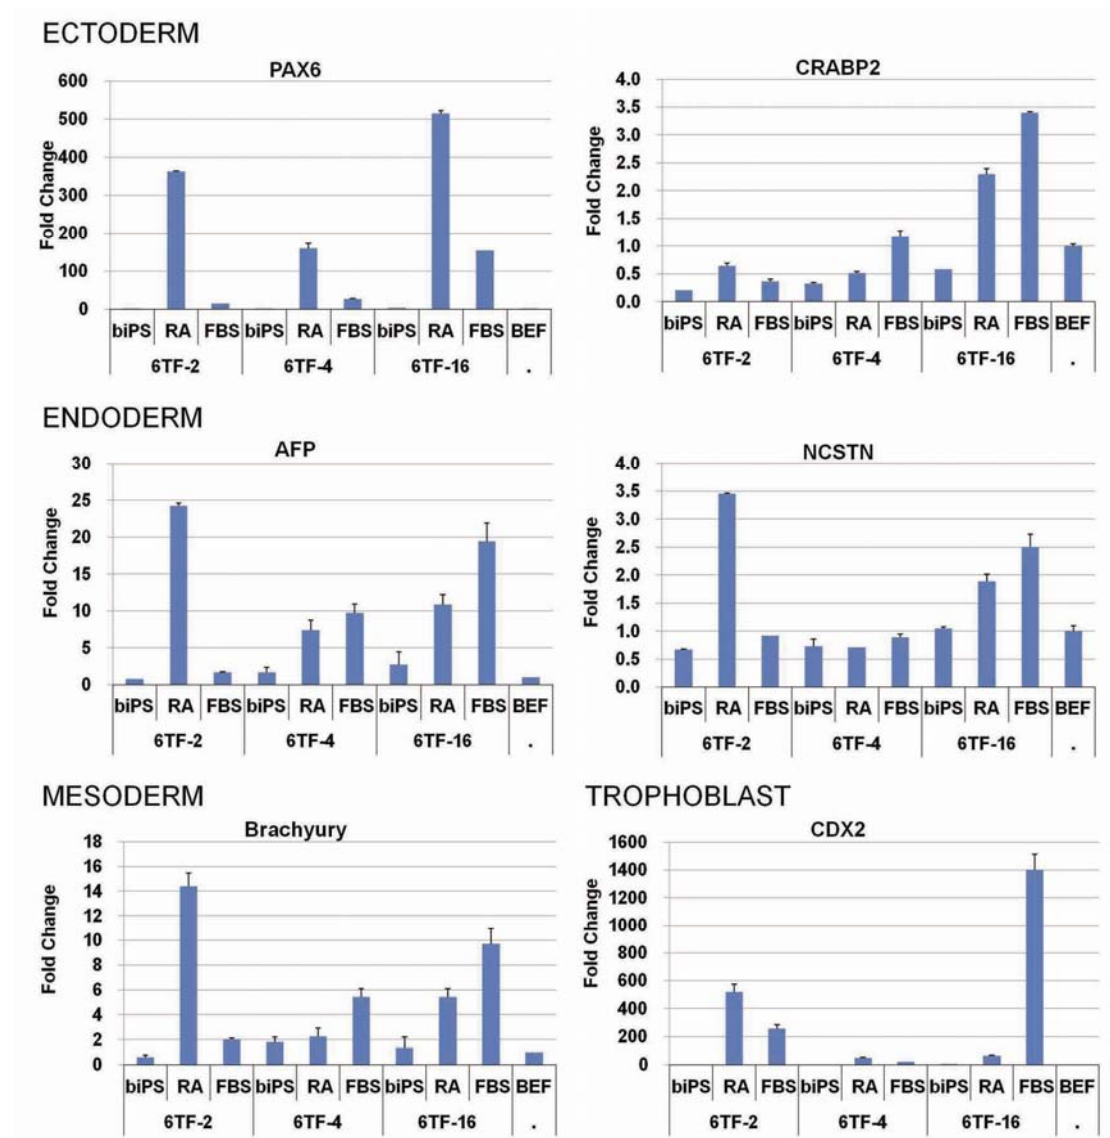

**Supplementary information, Figure S4** Real time-PCR analysis of relative transcript concentrations of lineage-specific genes in biPSC lines (6TF-2, 6TF-4 and 6TF-16), BEFs, and biPSCs differentiated into EB by using either FBS or retinoic acid (RA).

The y axis represents fold change relative to BEFs' expression. Error bars represent S.D. (n=3).
